# Supplementary material for: Ti3C2Tx-AuNP based paper substrates for label-free SERS detection of bacteria and multimodal antibacterials
Source: Royal Society of Chemistry journal article supplement (doi:10.1039/d4ra03723e), 2024-01-01
Supplement: d4ra03723e1.pdf [file d4ra03723e1.pdf]

## Supplementary material

### **Ti<sub>3</sub>C<sub>2</sub>T<sub>x</sub>-AuNP based paper substrates for label-free SERS detection of bacteria and multimodal antibacterials**

Boya Shi,<sup>a</sup> Li Jiang,<sup>\*a</sup> Ruikai Ma,<sup>a</sup> Weidan Zhao,<sup>a</sup> Yekai Zheng,<sup>a</sup> Wangwei Pan,<sup>a</sup> Mi Liu,<sup>a</sup> Shangzhong Jin<sup>a</sup> and Yan Zhou<sup>\*b</sup>

<sup>a</sup> College of Optical and Electronic Technology, China Jiliang University, Hangzhou 310018, P. R. China. Email: lijia@cjlu.edu.cn

<sup>b</sup> Wenzhou Key Laboratory of Sanitary Microbiology, Key Laboratory of Laboratory Medicine, Ministry of Education, China, School of Laboratory Medicine and Life Sciences, Wenzhou Medical University, Wenzhou, Zhejiang, 325035, P. R. China. Email: zhouyan@wmu.edu.cn

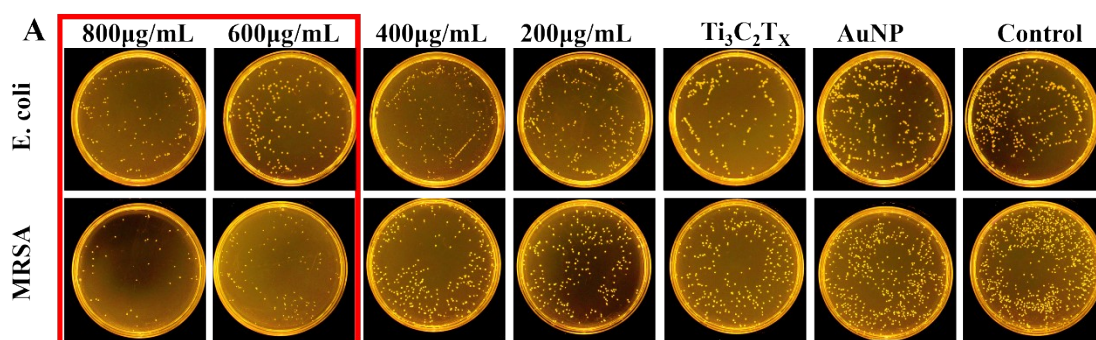

Figure. S1 Antibacterial activities in aqueous suspensions without laser after 5 h: bacterial suspensions with cellulose paper soaked in NaCl solution (0.9%) were used as control. Photographs of agar plates onto which *E. coli* and MRSA bacterial cells were recultivated after treatment with cellulose paper soaked in 200 µg/mL to 800 µg/mL Ti<sub>3</sub>C<sub>2</sub>T<sub>x</sub>-AuNP nanocomposite, Ti<sub>3</sub>C<sub>2</sub>T<sub>x</sub> and AuNP, respectively.

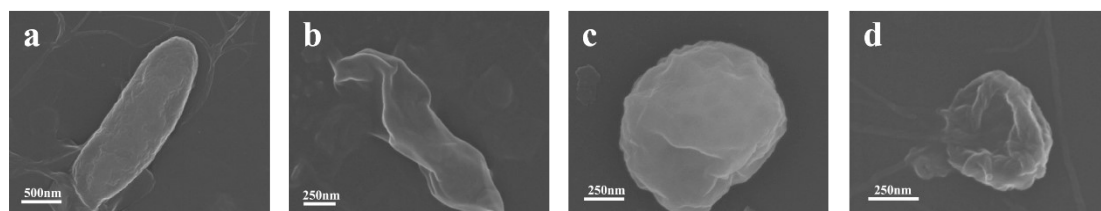

Figure. S2 SEM images of the *E. coli* (b) and MRSA (d) treated with cellulose paper soaked in 600 µg/mL of Ti<sub>3</sub>C<sub>2</sub>T<sub>x</sub>-AuNP. Control bacterial cells (a, c).

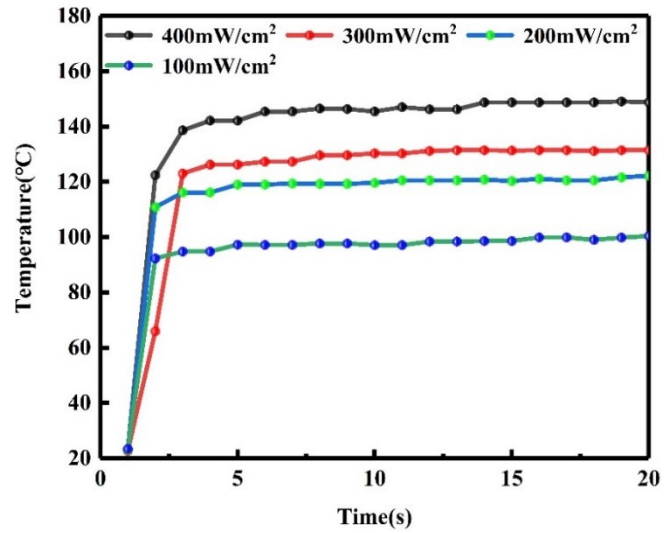

Figure. S3 Temperature changes of dry cellulose paper soaked in 600 µg/mL  $Ti_3C_2T_x$ -AuNP nanocomposite with a series of power densities of 808 nm laser irradiation.

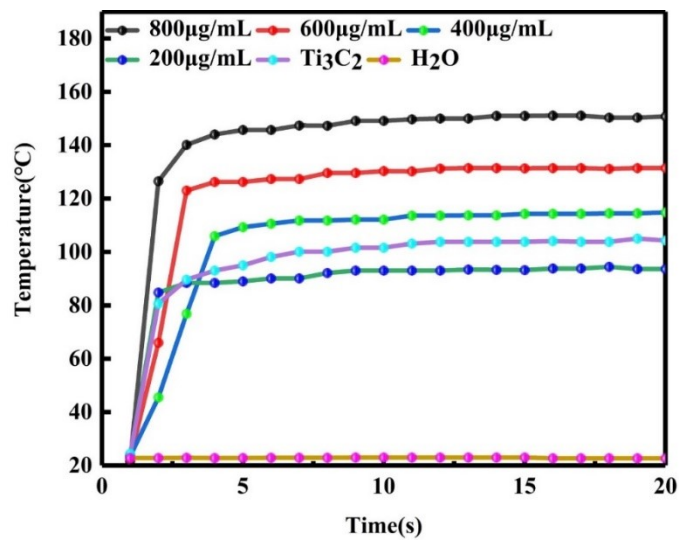

Figure. S4 Temperature changes after NIR irradiation (808 nm, 300 mW/cm²) for 20s with various materials and different concentrations of  $Ti_3C_2T_x$ -AuNP.

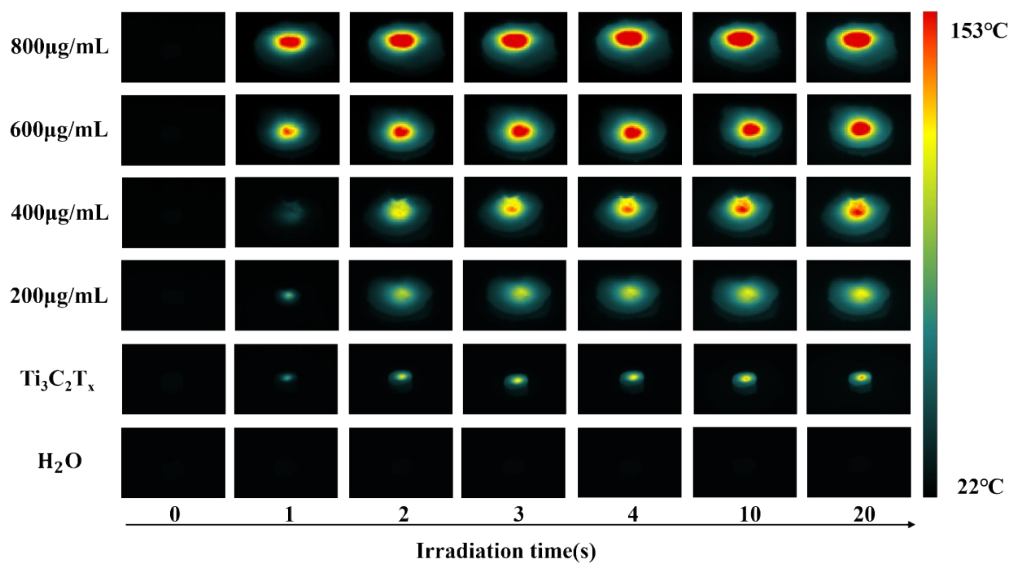

Figure. S5 Thermal imaging after NIR irradiation (808 nm, 300 mW/cm<sup>2</sup>) for 20s with various materials and different concentrations of Ti<sub>3</sub>C<sub>2</sub>T<sub>x</sub>-AuNP.

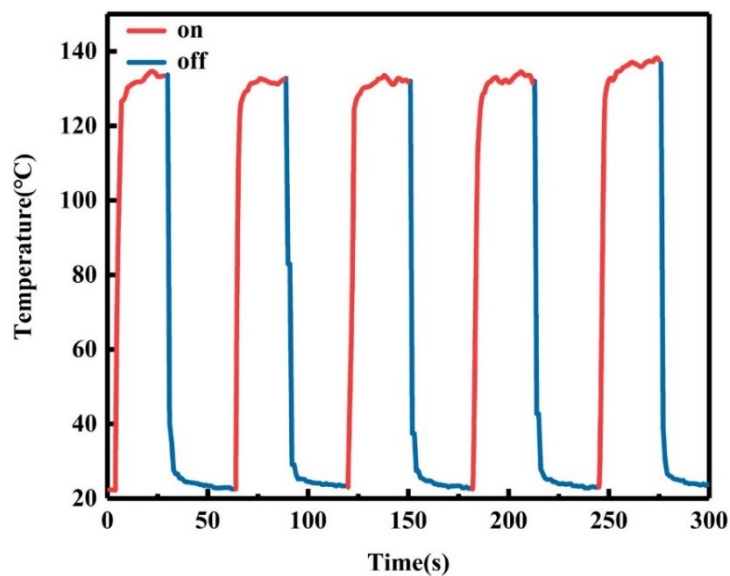

Figure. S6 Photothermal heating curves of dry cellulose paper soaked in 600 μg/mL Ti<sub>3</sub>C<sub>2</sub>T<sub>x</sub>-AuNP nanocomposite for five cycles under laser on/off cycles with NIR laser (808 nm, 300 mW/cm<sup>2</sup>) irradiation.

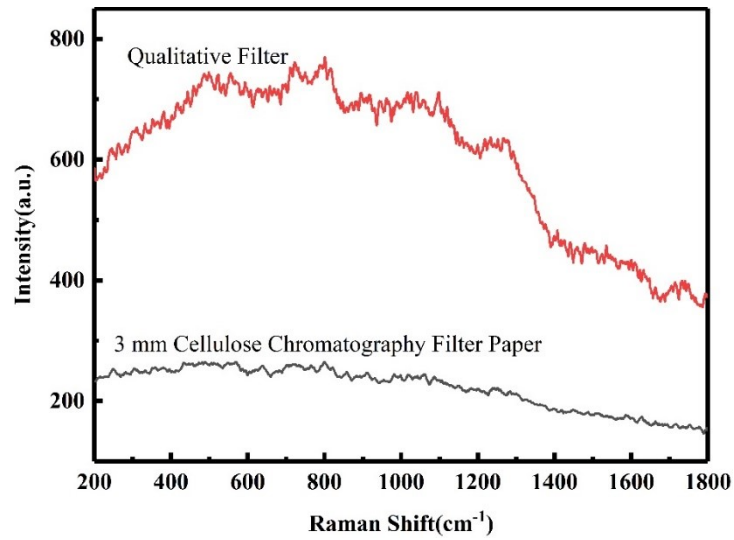

Figure. S7 Raman spectra of qualitative filter paper and 3mm cellulose chromatography filter paper.

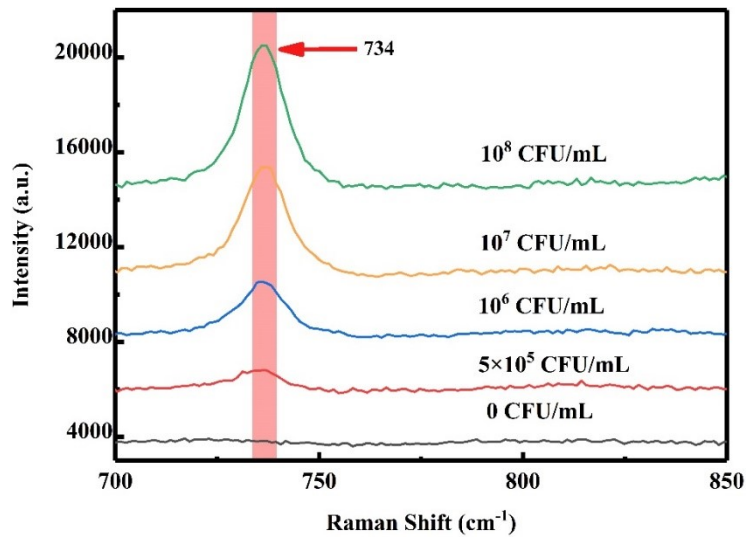

Figure. S8 SERS detection of MRSA in porcine skin

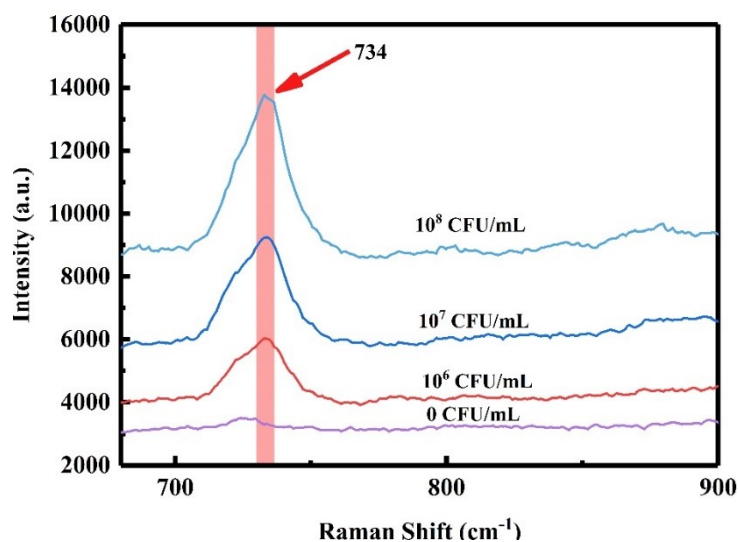

Figure. S9 SERS detection of MRSA in porcine serum.

Table S1 Direct SERS detection of bacteria

| Materials                                                              | substrate                   | Limit of Detection                                                        | Ref.             |
|------------------------------------------------------------------------|-----------------------------|---------------------------------------------------------------------------|------------------|
| Ag@TiO <sub>2</sub> electrospinning nanofibrous                        | TiO <sub>2</sub> nanofibers | E. coli is 10 <sup>8</sup> CFU/mL                                         | 1                |
| Au-TPP                                                                 | TPP                         | E. coli is 10 <sup>8</sup> CFU/mL;<br>S. aureus is 10 <sup>8</sup> CFU/mL | 2                |
| Paper substrate of Ti <sub>3</sub> C <sub>2</sub> T <sub>x</sub> -AuNP | Paper                       | E. coli is 10 <sup>5</sup> CFU/mL ;<br>MRSA is 5×10 <sup>5</sup> CFU/mL   | <i>This work</i> |

Table S2 Antibacterial activity of materials

| Materials                                                              | Laser  | Power                  | Time   | Bacterial Survival Rate                            | Ref.             |
|------------------------------------------------------------------------|--------|------------------------|--------|----------------------------------------------------|------------------|
| PDEGMA                                                                 | /      | /                      | 24 h   | S. aureus is about 10%                             | 3                |
| CS hydrogel                                                            | /      | /                      | 24 h   | E. coli is 26.35%<br>MRSA is 35.49%                | 4                |
| AuNst <sub>120</sub>                                                   | /      | /                      | 8 h    | S. aureus is 40%                                   | 5                |
| CuS@GDY                                                                | 808 nm | 400 mW/cm <sup>2</sup> | 10 min | E. coli is about 0.01%<br>S. aureus is about 0.01% | 6                |
| PDA-PAM/Mg <sup>2+</sup> gel                                           | 808 nm | 2 W/cm <sup>2</sup>    | 10 min | E. coli is about 7.06%<br>S. aureus is about 5.29% | 7                |
| Paper substrate of Ti <sub>3</sub> C <sub>2</sub> T <sub>x</sub> -AuNP | 808 nm | 300 mW/cm <sup>2</sup> | 5 min  | E. coli is about 0.06%<br>MRSA is 7.19%            | <i>This work</i> |

## References

1. Y. Yang, Z. J. Zhang, Y. L. He, Z. H. Wang, Y. B. Zhao and L. Sun, *Sens. Actuator B-Chem.*, 2018, **273**, 600-609.
2. H. M. Zhao, D. W. Zheng, H. Q. Wang, T. F. Lin, W. Liu, X. L. Wang, W. J. Lu, M. J. Liu, W. B. Liu, Y. M. Zhang, M. D. Liu and P. Zhang, *Int. J. Mol. Sci.*, 2022, **23**, 13.
3. H. Choi, A. Schulte, M. Müller, M. Park, S. W. Jo and H. Schönherr, *Adv. Healthc. Mater.*, 2021, **10**, 12.
4. W. S. Liu, R. Gao, C. F. Yang, Z. J. Feng, W. B. Ou-Yang, X. B. Pan, P. S. Huang, C. N. Zhang, D. L. Kong and W. W. Wang, *Sci. Adv.*, 2022, **8**, 13.
5. S. Kaul, P. Sagar, R. Gupta, P. Garg, N. Priyadarshi and N. K. Singhal, *ACS Appl. Mater. Interfaces*, 2022, **14**, 44084–44097.
6. Q. Bai, M. M. Liang, W. L. Wu, C. H. Zhang, X. Li, M. H. Liu, D. Q. Yang, L. Yu, Q. Z. Hu, L. N. Wang, F. L. Du, N. Sui and Z. L. Zhu, *Adv. Funct. Mater.*, 2022, **32**, 14.
7. Z. Y. Guo, Z. Z. Zhang, N. Zhang, W. X. Gao, J. Li, Y. J. Pu, B. He and J. Xie, *Bioact. Mater.*, 2022, **15**, 203-213.
